# Supplementary material for: Longevity and Neutralizing Capacity of IgG Antibodies against SARS-CoV-2 Generated by the Application of BNT162b2, AZD1222, Convidecia, Sputnik V, and CoronaVac Vaccines: a Cohort Study in the Mexican Population
Source: PubMed Central journal article supplement (PMC9927513; doi:10.1128/spectrum.02376-22), 2023-01-05
Supplement: spectrum.02376-22-s0002.pdf [file spectrum.02376-22-s0002.pdf]

SUPPLEMENTAL MATERIAL FOR PUBLICATION

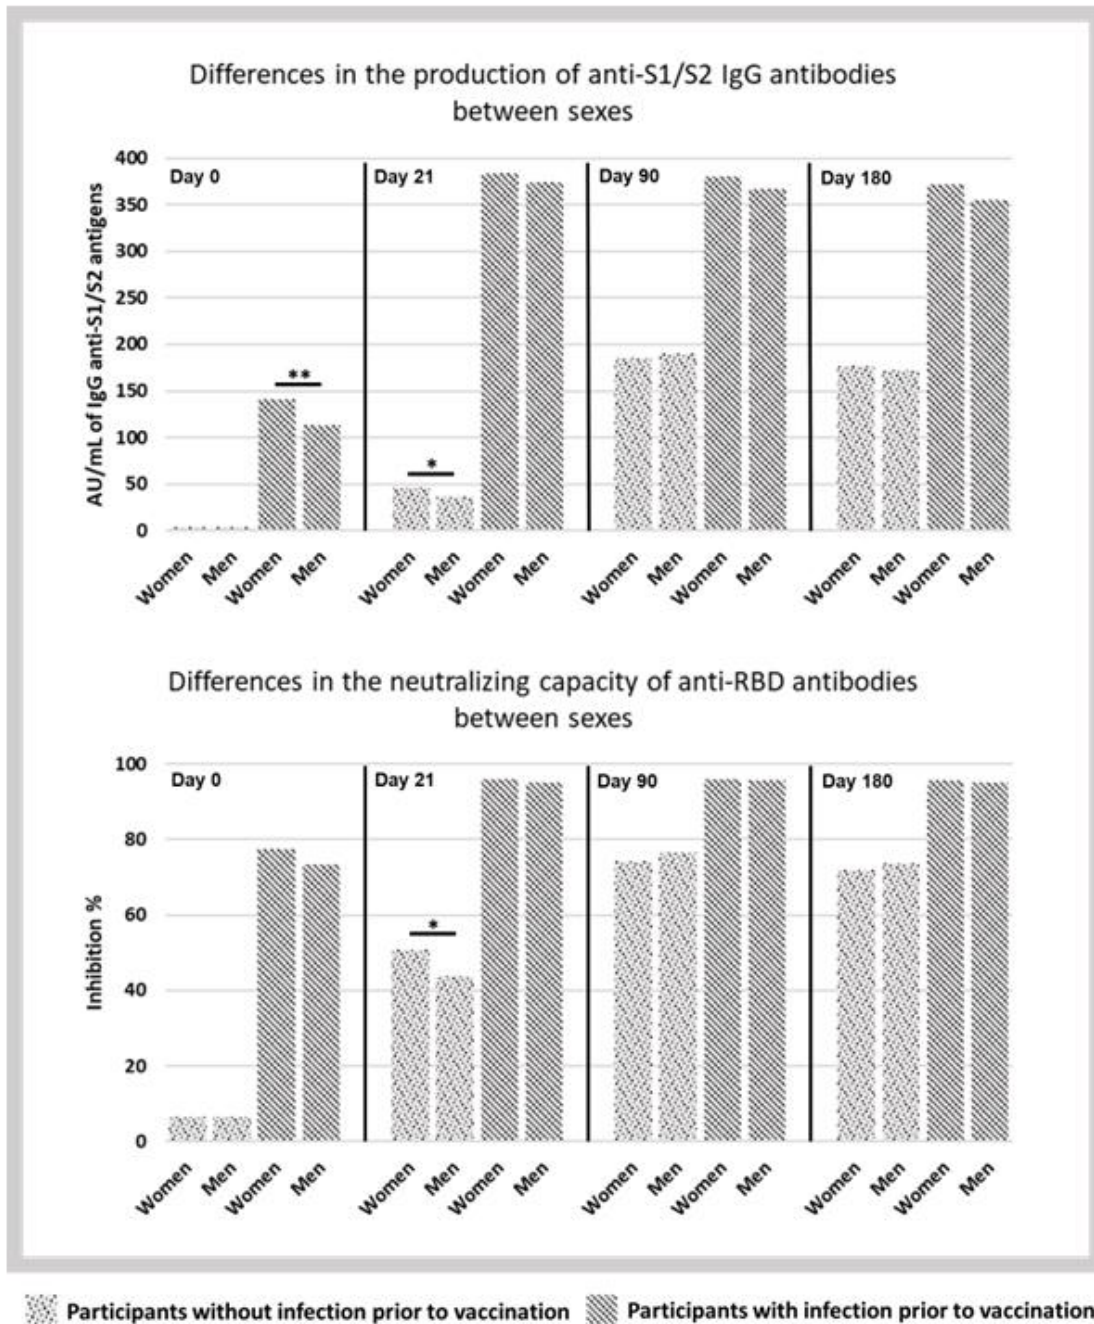

Fig. S1. Differences in the production of anti-S1/S2 IgG antibodies and the neutralizing capacity of anti-RBD antibodies between sexes.

### Variants that circulated in the State of Mexico before, during and after the study

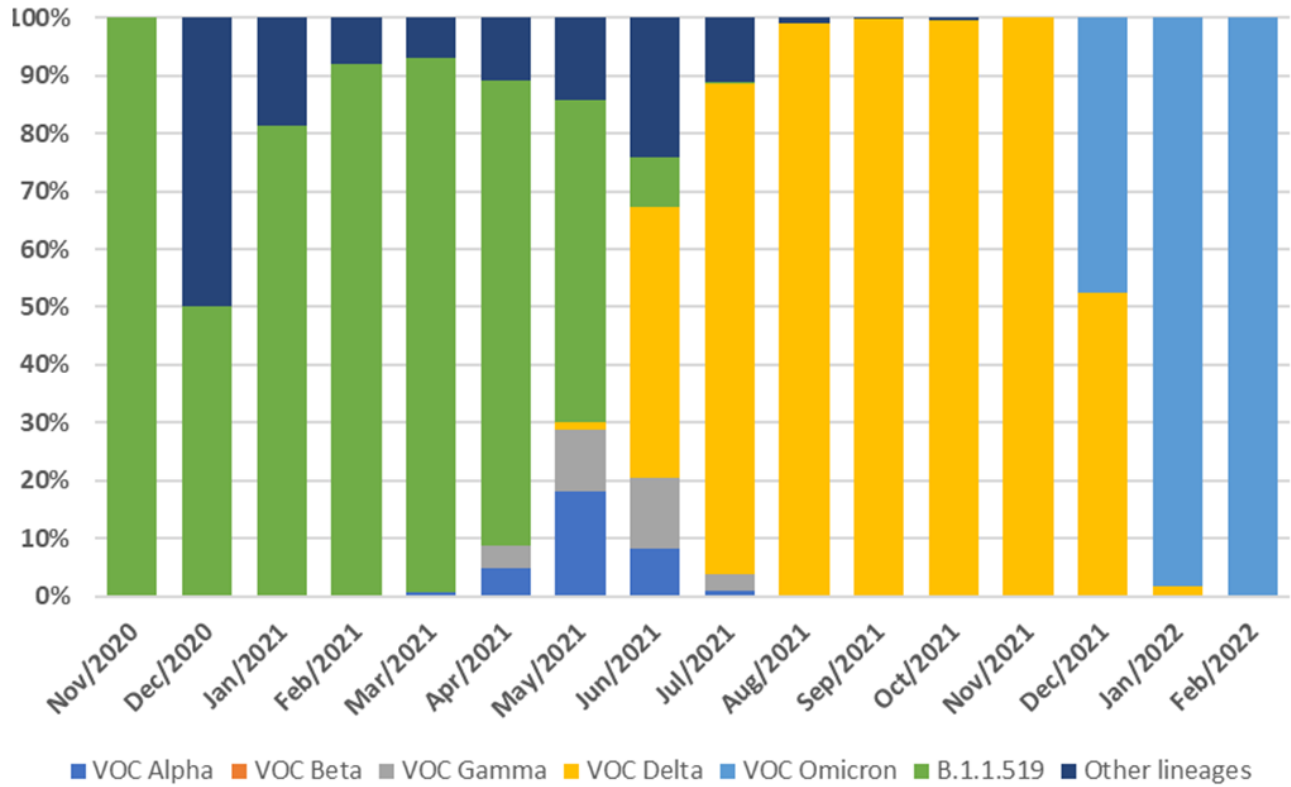

**Fig. S2. Variants that circulated in the State of Mexico before, during and after the study. Before: Nov/2020-Apr/2021; during: May/2021-Jan/2022; after: Feb/2022.**

**Supplemental Table 1. Confidence intervals of the data shown in Fig. 7.**

**Antibodies IgG anti-S1/S2 (AU/mL)**

| VACCINE                                        | Sample 1<br>mean (CI) | Sample 2<br>mean (CI) | Sample 3<br>mean (CI) | Sample 4<br>mean (CI) |
|------------------------------------------------|-----------------------|-----------------------|-----------------------|-----------------------|
| <i>Participants without previous infection</i> |                       |                       |                       |                       |
| <b>BNT162b2</b>                                | 3.8 (3.7-3.9)         | 58.3 (47.8-68.8)      | 331.3 (299.2-363.4)   | 203.8 (163.0-244.6)   |
| <b>AZD1222</b>                                 | 3.8 (3.7-3.9)         | 34.9 (26.4-43.5)      | 230.6 (206.9-254.3)   | 94.7 (56.0-133.4)     |
| <b>Convidecia</b>                              | 3.8 (3.7-3.9)         | 55.3 (47.9-62.7)      | 59.6 (34.6-84.6)      | 126.1 (93.0-159.2)    |
| <b>Sputnik V</b>                               | 3.9 (3.8-4.0)         | 42.8 (34.0-51.7)      | 269.9 (243.1-296.6)   | 249.6 (206.2-293.0)   |
| <b>CoronaVac</b>                               | 4.0 (3.9-4.2)         | 20.3 (9.9-30.7)       | 57.4 (26.4-88.5)      | 275.3 (228.9-321.8)   |
| <i>Participants with previous infection</i>    |                       |                       |                       |                       |
| <b>BNT162b2</b>                                | 167.5 (146.4-188.5)   | 400.0 (384.2-415.8)   | 400.0 (385.5-414.5)   | 400.0 (381.5-418.5)   |
| <b>AZD1222</b>                                 | 161.8 (140.1-183.4)   | 400.0 (384.7-415.3)   | 400.0 (384.9-415.2)   | 400.0 (379.3-420.7)   |
| <b>Convidecia</b>                              | 115.1 (89.9-140.3)    | 400.0 (383.8-416.2)   | 400.0 (383.1-416.9)   | 400.0 (379.3-420.7)   |
| <b>Sputnik V</b>                               | 147.2 (123.6-170.8)   | 400.0 (381.9-418.1)   | 400.0 (383.3-416.7)   | 400.0 (379.0-421.1)   |
| <b>CoronaVac</b>                               | 79.7 (59.7-99.8)      | 309.1 (293.0-325.1)   | 282.5 (265.8-299.2)   | 231.4 (210.7-252.1)   |

**Neutralizing capacity of antibodies against the RBD portion (% de inhibition)**

| VACCINE                                        | Sample 1<br>mean (CI) | Sample 2<br>mean (CI) | Sample 3<br>mean (CI) | Sample 4<br>mean (CI) |
|------------------------------------------------|-----------------------|-----------------------|-----------------------|-----------------------|
| <i>Participants without previous infection</i> |                       |                       |                       |                       |
| <b>BNT162b2</b>                                | 5.4 (4.1-6.7)         | 69.9 (61.7-78.1)      | 95.3 (88.7-102.0)     | 89.3 (81.8-96.9)      |
| <b>AZD1222</b>                                 | 10.0 (9.0-11.0)       | 45.3 (38.7-51.9)      | 87.5 (82.6-92.4)      | 71.5 (65.1-78.0)      |
| <b>Convidecia</b>                              | 7.3 (6.4-8.3)         | 50.2 (44.5-56.0)      | 49.7 (45.0-54.4)      | 50.4 (44.4-56.4)      |
| <b>Sputnik V</b>                               | 4.5 (3.4-5.6)         | 47.1 (40.2-54.1)      | 94.5 (88.6-100.3)     | 88.5(80.0-97.0)       |
| <b>CoronaVac</b>                               | 5.8 (4.7-6.9)         | 32.2 (24.6-39.8)      | 62.4 (56.5-68.3)      | 81.6 (73.0-90.0)      |
| <i>Participants with previous infection</i>    |                       |                       |                       |                       |
| <b>BNT162b2</b>                                | 77.9 (73.5-82.3)      | 92.7 (91.4-94.0)      | 95.9 (95.5-96.3)      | 96.2 (95.3-97.1)      |
| <b>AZD1222</b>                                 | 82.4 (77.9-87.0)      | 97.0 (95.8-98.4)      | 96.0 (95.6-96.5)      | 96.4 (95.4-97.3)      |
| <b>Convidecia</b>                              | 82.2 (77.0-87.5)      | 97.0 (95.6-98.3)      | 96.0 (95.5-96.5)      | 96.2 (95.3-97.1)      |
| <b>Sputnik V</b>                               | 73.3 (68.4-78.2)      | 97.2 (95.7-98.7)      | 96.8 (96.3-97.3)      | 95.9 (94.9-96.9)      |

|                  |                  |                  |                  |                  |
|------------------|------------------|------------------|------------------|------------------|
| <b>CoronaVac</b> | 72.0 (68.0-76.0) | 95.0 (93.7-96.5) | 94.5 (94.0-95.0) | 93.1 (92.1-94.2) |
|------------------|------------------|------------------|------------------|------------------|

**Supplemental Table 2. Analysis of the amount of anti-S1/S2 IgG antibodies and neutralizing capacity between the groups with and without comorbidity.**

**SAMPLE 2**

|                       | PARTICIPANTS WITHOUT COVID-19 PRIOR TO VACCINATION |      |         |                                                          |      |         |
|-----------------------|----------------------------------------------------|------|---------|----------------------------------------------------------|------|---------|
|                       | Mean of IgG anti-S1/S2 antibodies (AU/mL)          |      |         | Average percentage neutralization of anti-RBD antibodies |      |         |
|                       | YES                                                | NO   | p-value | YES                                                      | NO   | p-value |
| DIABETES              | 40.2                                               | 49.6 | 0.270   | 48.8                                                     | 48.3 | 0.999   |
| OBESITY               | 44.4                                               | 50.0 | 0.344   | 48.3                                                     | 48.4 | 0.892   |
| ARTERIAL HYPERTENSION | 39.2                                               | 50.0 | 0.362   | 50.0                                                     | 48.1 | 0.750   |
| IMMUNOSUPPRESSION     | 51.6                                               | 48.6 | 0.469   | 42.6                                                     | 48.5 | 0.529   |

|                       | PARTICIPANTS WITH COVID-19 PRIOR TO VACCINATION |       |              |                                                          |      |              |
|-----------------------|-------------------------------------------------|-------|--------------|----------------------------------------------------------|------|--------------|
|                       | Mean of IgG anti-S1/S2 antibodies (AU/mL)       |       |              | Average percentage neutralization of anti-RBD antibodies |      |              |
|                       | YES                                             | NO    | p-value      | YES                                                      | NO   | p-value      |
| DIABETES              | 390.1                                           | 370.1 | 0.231        | 91.9                                                     | 92.0 | <b>0.014</b> |
| OBESITY               | 372.1                                           | 372.9 | 0.860        | 90.8                                                     | 92.7 | 0.082        |
| ARTERIAL HYPERTENSION | 396.2                                           | 367.9 | <b>0.025</b> | 92.5                                                     | 91.9 | <b>0.025</b> |
| IMMUNOSUPPRESSION     | 384.3                                           | 372.2 | 0.408        | 96.8                                                     | 91.9 | 0.225        |

**SAMPLE 3**

|                       | PARTICIPANTS WITHOUT COVID-19 PRIOR TO VACCINATION |       |         |                                                          |      |         |
|-----------------------|----------------------------------------------------|-------|---------|----------------------------------------------------------|------|---------|
|                       | Mean of IgG anti-S1/S2 antibodies (AU/mL)          |       |         | Average percentage neutralization of anti-RBD antibodies |      |         |
|                       | YES                                                | NO    | p-value | YES                                                      | NO   | p-value |
| DIABETES              | 199.7                                              | 191.3 | 0.794   | 72.4                                                     | 72.4 | 0.932   |
| OBESITY               | 218.8                                              | 284.2 | 0.103   | 75.9                                                     | 71.3 | 0.249   |
| ARTERIAL HYPERTENSION | 224.8                                              | 186.2 | 0.107   | 78.0                                                     | 71.4 | 0.110   |
| IMMUNOSUPPRESSION     | 228.5                                              | 190.9 | 0.816   | 61.7                                                     | 72.7 | 0.732   |

|                       | PARTICIPANTS WITH COVID-19 PRIOR TO VACCINATION |       |              |                                                          |      |         |
|-----------------------|-------------------------------------------------|-------|--------------|----------------------------------------------------------|------|---------|
|                       | Mean of IgG anti-S1/S2 antibodies (AU/mL)       |       |              | Average percentage neutralization of anti-RBD antibodies |      |         |
|                       | YES                                             | NO    | p-value      | YES                                                      | NO   | p-value |
| DIABETES              | 399.6                                           | 368.4 | 0.083        | 89.8                                                     | 93.0 | 0.894   |
| OBESITY               | 372.2                                           | 272.3 | 0.810        | 92.3                                                     | 92.8 | 0.217   |
| ARTERIAL HYPERTENSION | 390.6                                           | 368.3 | <b>0.027</b> | 91.9                                                     | 92.8 | 0.086   |
| IMMUNOSUPPRESSION     | 363.0                                           | 372.7 | 0.637        | 94.3                                                     | 92.5 | 0.551   |

**SAMPLE 4**

---

---

**PARTICIPANTS WITHOUT COVID-19 PRIOR TO VACCINATION**

|                              | Mean of IgG anti-S1/S2 antibodies<br>(AU/mL) |           |                | Average percentage neutralization of<br>anti-RBD antibodies |           |                |
|------------------------------|----------------------------------------------|-----------|----------------|-------------------------------------------------------------|-----------|----------------|
|                              | <b>SÍ</b>                                    | <b>NO</b> | <b>p-value</b> | <b>SÍ</b>                                                   | <b>NO</b> | <b>p-value</b> |
| <b>DIABETES</b>              | 159.9                                        | 188.2     | 0.291          | 64.1                                                        | 71.0      | 0.161          |
| <b>OBESITY</b>               | 180.1                                        | 186.9     | 0.679          | 67.8                                                        | 71.2      | 0.617          |
| <b>ARTERIAL HYPERTENSION</b> | 151.6                                        | 192.1     | 0.172          | 65.7                                                        | 71.2      | 0.068          |
| <b>IMMUNOSUPPRESSION</b>     | 251.6                                        | 182.6     | 0.507          | 66.1                                                        | 70.4      | 0.924          |

**PARTICIPANTS WITH COVID-19 PRIOR TO VACCINATION**

|                              | Mean of IgG anti-S1/S2 antibodies<br>(AU/mL) |           |                | Average percentage neutralization of<br>anti-RBD antibodies |           |                |
|------------------------------|----------------------------------------------|-----------|----------------|-------------------------------------------------------------|-----------|----------------|
|                              | <b>YES</b>                                   | <b>NO</b> | <b>p-value</b> | <b>YES</b>                                                  | <b>NO</b> | <b>p-value</b> |
| <b>DIABETES</b>              | 383.7                                        | 358.1     | 0.182          | 89.5                                                        | 93.1      | 0.801          |
| <b>OBESITY</b>               | 341.2                                        | 374.0     | 0.084          | 90.7                                                        | 93.8      | 0.463          |
| <b>ARTERIAL HYPERTENSION</b> | 376.5                                        | 358.2     | 0.179          | 93.0                                                        | 92.5      | 0.642          |
| <b>IMMUNOSUPPRESSION</b>     | 400.0                                        | 360.1     | 0.240          | 94.3                                                        | 92.6      | 0.181          |
